# Supplementary material
Source: PubMed Central journal article supplement (PMC3845500)

Table E1: Sequences of primers used for real-time PCR

|               | <i>Forward primer</i>    | <i>bp</i> | <i>Reverse primer</i>   | <i>bp</i> |
|---------------|--------------------------|-----------|-------------------------|-----------|
| mHPRT         | TGCCGAGGATTTGGAAAAG      | 20        | CCCCCCTTGAGCACACAG      | 18        |
| mIFN $\gamma$ | CAGCAACAGCAAGGCGAAAAGG   | 23        | TTCCGCTTCCTGAGGCTGGAT   | 22        |
| mIL4          | CTGTAGGGCTTCCAAGGTGCTTCG | 24        | CCATTTGCATGATGCTCTTAGGC | 24        |
| mIL17A        | ACTACCTCAACCGTTCCACG     | 20        | AGAATTCATGTGGTGGTCCA    | 20        |
| mIL17F        | TGGAGAAACCAGCATGAAGTG    | 21        | AGTCCCAACATCAACAGTAGC   | 21        |

All amplicons span at least one intron (m = murine)

ONLINE REPOSITORY

**Diesel exhaust particle induction of IL17A contributes to severe asthma**

Eric B. Brandt<sup>1</sup>, Melinda Butsch Kovacic<sup>1</sup>, Gerald B. Lee<sup>1</sup>, Aaron M. Gibson<sup>1</sup>, Thomas H. Acciani<sup>2</sup>, Timothy D. Le Cras<sup>2</sup>, Patrick H. Ryan<sup>3</sup>, Alison L. Budelsky<sup>4</sup>, Gurjit K. Khurana Hershey<sup>1</sup>

<sup>1</sup>Division of Asthma Research, <sup>2</sup>Division of Pulmonary Biology, <sup>3</sup>Division of Epidemiology and Biostatistics, Cincinnati Children's Hospital Medical Center, Department of Pediatrics, University of Cincinnati, Cincinnati, OH 45229, USA.

<sup>4</sup>Department of Inflammation Research, Amgen, Seattle, WA.

Corresponding author: Gurjit K. Khurana Hershey, Division of Asthma Research, Cincinnati Children's Hospital Medical Center, Cincinnati, OH 45229.

Please send requests for reprints to Dr. Gurjit K. Khurana Hershey.

E-mail address: [Gurjit.Hershey@cchmc.org](mailto:Gurjit.Hershey@cchmc.org), Tel: (513) 636 7054, Fax: (513) 636-1657.

**Figure E1: Exposure to HDM±DEP does not promote a Th1 response.**

Representative FACS dot plots of IFN $\gamma$  expression by CD4<sup>+</sup>CD44<sup>+</sup> effector T-cells and frequency of IFN $\gamma$ <sup>+</sup>IL-17A<sup>+</sup> double producers (n = 5-7 mice / group; 1 way ANOVA, \*\*\*p < 0.001; \* p < 0.05)

ONLINE REPOSITORY

Figure E1

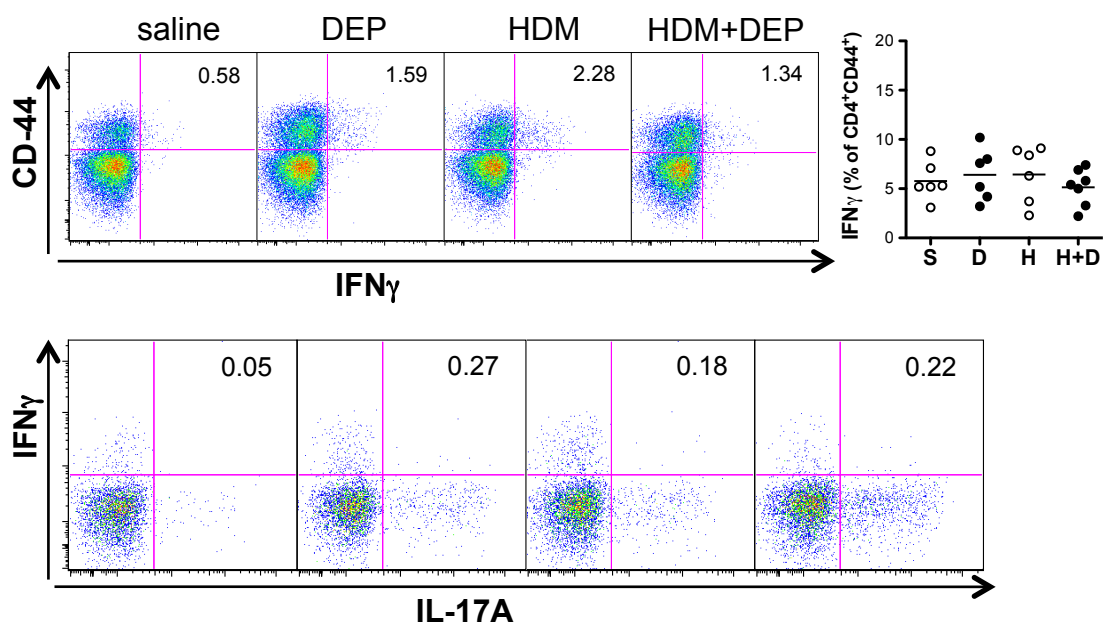

Supplement: NIHMS526709-supplement-01.pdf [file NIHMS526709-supplement-01.pdf]
